# Supplementary material for: Inhibiting receptor tyrosine kinase AXL with small molecule inhibitor BMS-777607 reduces glioblastoma growth, migration, and invasion in vitro and in vivo
Source: PubMed Central journal article supplement (PMC4891090; doi:10.18632/oncotarget.7130), 2016-02-02
Supplement: oncotarget-07-09876-s001.pdf [file oncotarget-07-09876-s001.pdf]

## Inhibiting receptor tyrosine kinase AXL with small molecule inhibitor BMS-777607 reduces glioblastoma growth, migration, and invasion *in vitro* and *in vivo*

### Supplementary Materials

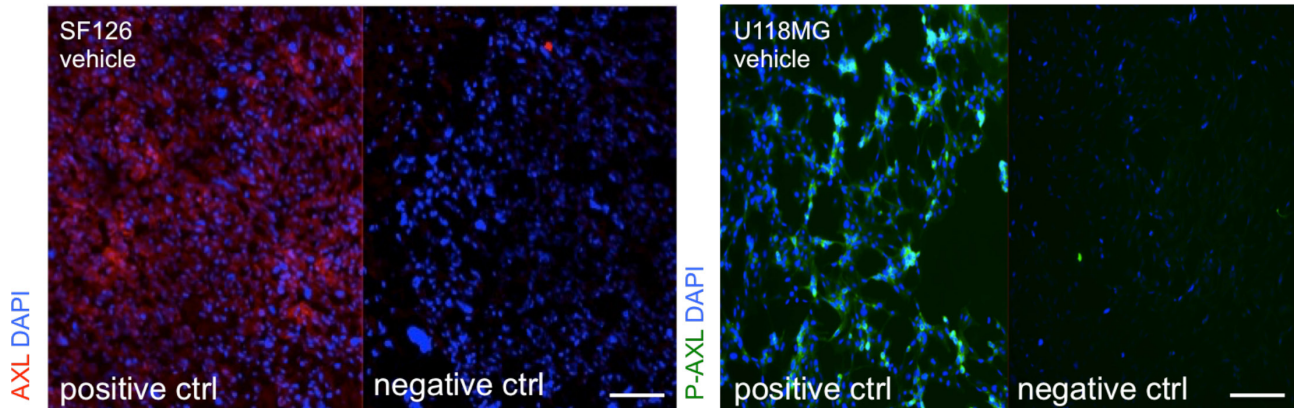

**Supplementary Figure S1:** Negative and positive control with incubation of secondary antibody only in case of anti-AXL staining (left image) and anti-phospho-AXL staining (right image).

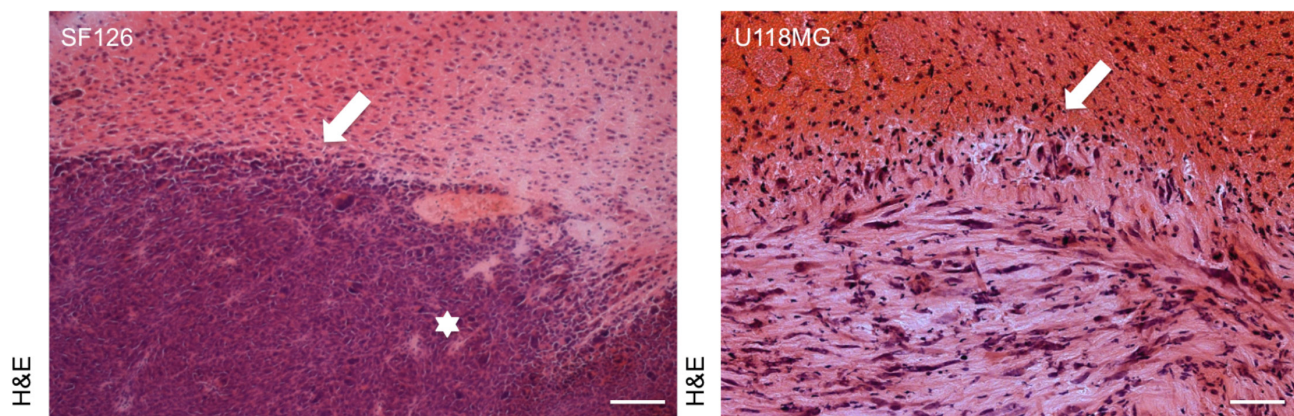

**Supplementary Figure S2:** H & E staining displays different growth pattern of both cells. The SF126 tumor (left image, arrow) show vascular proliferates (left image, star) and less invasive growth compared to U118MG (right image, arrow).

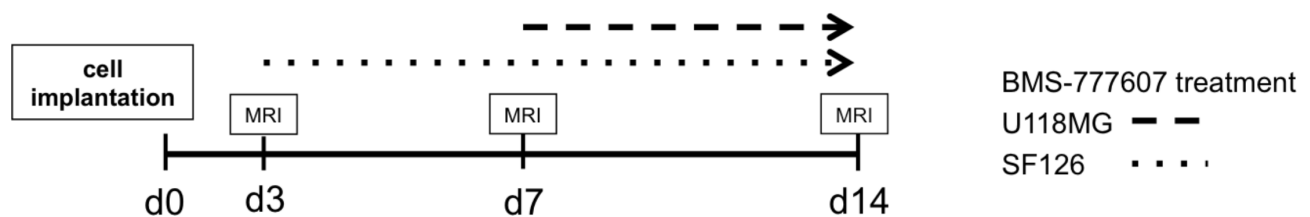

**Supplementary Figure S3:** Experimental setting of intracranial xenograft model with U118MG and SF126 cells. Treatment started after proven tumor mass on MRI.
